# Supplementary material
Source: PubMed Central journal article supplement (PMC5856592)
Supplement: NIHMS925896-supplement-supplement_1.pdf [file NIHMS925896-supplement-supplement_1.pdf]

Supplementary Table 1 - Differences in symptom occurrence, severity, and distress between premenopausal (N=115) and postmenopausal (N=212) patients 12 months after breast cancer surgery

| Symptom<br><i>(listed from highest to lowest occurrence rates for the total sample)</i> | Occurrence (%)   |                |                 | Severity <sup>†</sup><br>Mean (SD) |           | Distress <sup>††</sup><br>Mean (SD) |           |
|-----------------------------------------------------------------------------------------|------------------|----------------|-----------------|------------------------------------|-----------|-------------------------------------|-----------|
|                                                                                         | Total<br>(N=327) | Pre<br>(N=115) | Post<br>(N=212) | Pre                                | Post      | Pre                                 | Post      |
| Wake during the night                                                                   | 62.9             | 61.7           | 63.7            | 3.9 (2.5)                          | 4.1 (2.5) | 3.8 (3.2)                           | 3.5 (2.8) |
| Fatigue or tiredness                                                                    | 52.1             | 54.8           | 50.0            | 4.7 (2.6)                          | 3.8 (2.4) | 4.1 (3.1)                           | 3.2 (2.6) |
| Hot flashes                                                                             | 50.6             | 58.3           | 45.3            | 4.4 (2.5)                          | 4.4 (2.1) | 4.1 (3.1)                           | 3.6 (2.7) |
| Joint pain or stiffness                                                                 | 47.3             | 40.0           | 51.9            | 4.3 (2.3)                          | 4.2 (2.3) | 4.1 (2.8)                           | 4.0 (2.7) |
| Waking too early                                                                        | 43.1             | 41.7           | 42.9            | 3.7 (2.6)                          | 4.0 (2.4) | 3.5 (3.3)                           | 3.4 (2.6) |
| Difficulty falling asleep                                                               | 42.8             | 44.3           | 42.0            | 4.1 (2.8)                          | 4.2 (2.6) | 4.0 (3.0)                           | 4.0 (2.8) |
| Backache or neckache                                                                    | 38.0             | 40.9           | 35.8            | 4.3 (2.9)                          | 4.1 (2.3) | 3.9 (3.2)                           | 3.6 (2.7) |
| Impatience                                                                              | 37.4             | 43.5           | 34.4            | 3.8 (2.3)                          | 2.7 (1.8) | 3.9 (2.9)                           | 2.6 (2.0) |
| Night sweats                                                                            | 37.4             | 44.3           | 32.5            | 4.1 (2.5)                          | 4.3 (2.0) | 3.5 (3.2)                           | 3.7 (2.5) |
| Anxiety                                                                                 | 35.6             | 40.9           | 31.6            | 3.9 (2.0)                          | 3.2 (1.9) | 4.3 (3.0)                           | 3.4 (2.4) |
| Forgetfulness                                                                           | 34.1             | 40.0           | 31.6            | 3.3 (2.3)                          | 3.1 (2.0) | 3.6 (2.7)                           | 3.0 (2.5) |
| Irritability                                                                            | 33.5             | 41.7           | 29.7            | 3.8 (2.4)                          | 2.7 (1.9) | 3.8 (3.0)                           | 3.0 (2.2) |
| General body aches                                                                      | 32.3             | 32.2           | 32.1            | 3.6 (2.1)                          | 3.5 (2.3) | 3.6 (2.8)                           | 3.4 (2.7) |
| Daytime sweats                                                                          | 32.0             | 39.7           | 26.9            | 4.3 (2.4)                          | 4.2 (1.8) | 3.8 (2.8)                           | 3.9 (2.5) |
| Difficulty concentrating                                                                | 30.2             | 37.4           | 26.9            | 3.3 (2.0)                          | 3.2 (1.6) | 3.4 (2.6)                           | 3.1 (2.3) |
| Numbness or tingling                                                                    | 29.6             | 27.8           | 29.7            | 3.8 (2.3)                          | 3.9 (2.6) | 3.6 (3.0)                           | 3.3 (2.8) |
| Tension                                                                                 | 29.3             | 33.9           | 26.9            | 3.7 (2.1)                          | 3.5 (2.2) | 3.3 (2.7)                           | 3.5 (2.6) |
| Weight gain                                                                             | 28.7             | 37.4           | 24.5            | 3.9 (2.9)                          | 3.7 (2.7) | 5.1 (3.3)                           | 4.4 (3.4) |
| Depression                                                                              | 28.4             | 34.5           | 24.5            | 3.3 (2.1)                          | 3.7 (2.7) | 3.5 (2.4)                           | 3.9 (2.9) |
| Painful/tender breasts                                                                  | 25.1             | 22.6           | 26.9            | 3.8 (2.8)                          | 3.4 (2.2) | 3.6 (3.1)                           | 3.2 (2.5) |
| Anger                                                                                   | 23.1             | 27.8           | 20.3            | 4.3 (2.5)                          | 3.4 (2.2) | 4.5 (3.0)                           | 3.8 (3.0) |
| Vaginal dryness                                                                         | 23.1             | 18.3           | 25.9            | 4.3 (2.0)                          | 4.6 (2.9) | 3.9 (2.8)                           | 3.9 (2.9) |
| Mood swings                                                                             | 20.7             | 24.3           | 17.9            | 4.5 (2.8)                          | 3.5 (2.5) | 4.5 (3.2)                           | 3.1 (2.2) |
| Headache                                                                                | 20.1             | 24.3           | 17.9            | 4.4 (2.6)                          | 3.5 (2.8) | 4.2 (3.0)                           | 2.9 (2.9) |
| Nervousness                                                                             | 17.7             | 19.1           | 16.0            | 3.0 (1.9)                          | 3.3 (1.7) | 3.4 (2.1)                           | 3.0 (2.2) |
| Urinary frequency                                                                       | 17.4             | 16.5           | 17.5            | 3.8 (1.8)                          | 3.7 (2.2) | 3.3 (2.8)                           | 3.1 (2.7) |
| Constipation                                                                            | 17.1             | 13.9           | 19.3            | 4.2 (2.6)                          | 3.2 (2.3) | 4.1 (3.2)                           | 2.8 (2.2) |
| Eating more than usual                                                                  | 16.8             | 25.2           | 12.3            | 2.9 (2.0)                          | 3.5 (2.6) | 3.8 (2.8)                           | 4.2 (3.1) |
| Lost sexual interest                                                                    | 16.5             | 22.6           | 13.7            | 4.7 (2.6)                          | 6.2 (2.6) | 3.8 (3.0)                           | 5.6 (3.4) |
| Tearful/crying spells                                                                   | 15.9             | 17.4           | 13.7            | 4.0 (2.4)                          | 3.5 (2.4) | 4.5 (2.9)                           | 3.2 (2.9) |
| Swollen hands/feet                                                                      | 15.3             | 13.0           | 15.6            | 4.2 (1.8)                          | 3.5 (2.3) | 4.9 (2.9)                           | 3.2 (2.5) |
| Abdominal bloating                                                                      | 15.0             | 19.1           | 13.2            | 4.3 (2.8)                          | 4.6 (2.7) | 3.5 (3.6)                           | 4.8 (3.7) |

|                         |      |      |      |           |           |           |           |
|-------------------------|------|------|------|-----------|-----------|-----------|-----------|
| Indigestion             | 12.6 | 11.3 | 12.7 | 3.0 (1.4) | 3.3 (2.1) | 2.4 (1.9) | 3.3 (2.4) |
| Lost interest in things | 11.7 | 12.2 | 11.8 | 3.4 (2.1) | 3.7 (2.4) | 3.2 (2.8) | 3.4 (2.6) |
| Skin breakout/acne      | 10.5 | 17.4 | 7.1  | 2.8 (2.3) | 3.5 (2.6) | 2.5 (2.6) | 3.7 (3.0) |
| Hostility               | 10.2 | 16.5 | 7.1  | 4.0 (2.3) | 2.7 (2.1) | 4.8 (3.2) | 2.7 (2.4) |
| Nausea/upset stomach    | 9.9  | 11.3 | 9.0  | 3.3 (1.8) | 3.3 (1.6) | 4.2 (3.1) | 3.5 (3.0) |
| Heart races/pounds      | 9.6  | 8.7  | 9.9  | 3.0 (1.6) | 2.5 (1.6) | 2.8 (1.7) | 2.3 (1.8) |
| Panic feelings          | 9.6  | 11.3 | 9.0  | 3.9 (2.3) | 3.5 (2.0) | 4.1 (2.9) | 4.0 (2.3) |
| Dizziness               | 9.0  | 7.8  | 9.4  | 2.7 (2.5) | 3.3 (2.7) | 3.3 (3.1) | 3.6 (3.1) |
| Shortness of breath     | 8.4  | 7.8  | 9.0  | 1.8 (0.7) | 3.3 (2.0) | 2.3 (1.8) | 3.8 (2.2) |
| Alcohol cravings        | 7.2  | 10.4 | 5.7  | 2.7 (1.7) | 1.9 (0.7) | 1.3 (2.3) | 2.5 (2.0) |
| Diarrhea                | 7.2  | 7.8  | 7.1  | 5.0 (3.0) | 3.4 (2.6) | 5.1 (3.8) | 2.9 (2.4) |
| Loss of appetite        | 7.2  | 5.2  | 8.5  | 3.7 (2.1) | 3.6 (2.1) | 2.0 (0.7) | 2.7 (2.3) |
| Cramps                  | 6.0  | 7.8  | 5.2  | 5.1 (2.5) | 4.6 (2.8) | 3.2 (2.8) | 5.3 (3.3) |
| Increased sexual desire | 4.5  | 7.0  | 3.3  | 4.0 (2.2) | 2.6 (1.7) | 2.4 (2.8) | 0.6 (0.9) |

Abbreviations: Pre = premenopausal; Post = postmenopausal; SD = standard deviation

\*Symptom severity ranged from 0 (none) to 10 (intolerable).

\*\*Symptom distress ranged from 0 (not at all distressing) to 10 (very distressing).
